# Supplementary material
Source: publisher figshare collection journal article supplement (https://tandf.figshare.com/ndownloader/files/15203654)
Supplement: Supplementary file 1 [file 15203654]

## Sheet: Dataset for cellular response
	Dataset for cellular response
Name	Pend (Q)	n	Diacid(A)	Compelete Molecule	FRLF NMA(%)	Log_FRLF
1A	DTM	2	Succinate	DTMSuccinate	114.6	2.05918
2A	DTM	2	Glutarate	DTMGlutarate	94.6	1.97589
3A	DTM	2	Diglycolate	DTMDiglycolate	88.3	1.94596
4A	DTM	2	Adipate	DTMAdipate	86.1	1.935
5A	DTM	2	Suberate	DTMSuberate	91.9	1.96332
6A	DTM	2	Dioxaoctanedione	DTM Dioxaoctanedione	84.6	1.92737
7A	DTM	2	Sebacate	DTMSebacate	89.4	1.95134
9A	DTE	2	Glutarate	DTEGlutarate	78.4	1.89432
10A	DTE	2	Diglycolate	DTEDiglycolate	82	1.91381
11A	DTE	2	Adipate	DTEAdipate	75.5	1.87795
12A	DTE	2	Suberate	DTESuberate	69.5	1.84198
13A	DTE	2	Dioxaoctanedione	DTE Dioxaoctanedione	77.6	1.88986
14A	DTE	2	Sebacate	DTESebacate	68	1.83251
15A	DTB	2	Succinate	DTBSuccinate	75.8	1.87967
16A	DTB	2	Glutarate	DTBGlutarate	73.4	1.8657
17A	DTB	2	Diglycolate	DTBDiglycolate	78.2	1.89321
18A	DTB	2	Adipate	DTBAdipate	32.2	1.50786
19A	DTB	2	Suberate	DTBSuberate	76.3	1.88252
20A	DTB	2	Dioxaoctanedione	DTB Dioxaoctanedione	82.8	1.91803
21A	DTB	2	Sebacate	DTBSebacate	58	1.76343
22A	DTH	2	Succinate	DTHSuccinate	30.2	1.48001
23A	DTH	2	Glutarate	DTHGlutarate	52.8	1.72263
24A	DTH	2	Diglycolate	DTHDiglycolate	69.9	1.84448
25A	DTH	2	Adipate	DTHAdipate	16.4	1.21484
26A	DTH	2	Suberate	DTHSuberate	63.6	1.80346
27A	DTH	2	Dioxaoctanedione	DTH Dioxaoctanedione	59	1.77085
28A	DTH	2	Sebacate	DTHSebacate	51	1.70757
29A	DTO	2	Succinate	DTOSuccinate	25.5	1.40654
30A	DTO	2	Glutarate	DTOGlutarate	43.1	1.63448
31A	DTO	2	Diglycolate	DTODiglycolate	66.5	1.82282
32A	DTO	2	Adipate	DTOAdipate	4.7	0.672098
33A	DTO	2	Suberate	DTOSuberate	47.3	1.67486
34A	DTO	2	Dioxaoctanedione	DTO Dioxaoctanedione	71.6	1.85491
35A	DTO	2	Sebacate	DTOSebacate	18.4	1.26482
36A	DTD	2	Glutarate	DTDGlutarate	18.8	1.27416
38A	DTD	2	Adipate	DTDAdipate	1.9	0.278754
39A	DTD	2	Suberate	DTDSuberate	31.4	1.49693
41A	DTD	2	Sebacate	DTDSebacate	8.6	0.934498
42A	DTBn	2	Adipate	DTBnAdipate	52.48	1.71999
43A	DTBn	2	Diglycolate	DTBnDiglycolate	73.77	1.86788
44A	DTBn	2	Dioxaoctanedioate	DTBnDioxaoctanedioate	69.93	1.84466
45A	DTBn	2	Glutarate	DTBnGlutarate	71.49	1.85425
46A	DTBn	2	Methyl adipate	DTBnMethyl adipate	32.01	1.50529
47A	DTBn	2	Sebacate	DTBnSebacate	66.53	1.82302
48A	DTBn	2	Suberate	DTBn Suberate	67.24	1.82763
49A	DTBn	2	Succinate	DTBnSuccinate	77.77	1.89081
50A	DTiP	2	Adipate	DTiPAdipate	62.36	1.79491
51A	DTiP	2	Diglycolate	DTiPDiglycolate	81.44	1.91084
52A	DTiP	2	Dioxaoctanedioate	DTiPDioxaoctanedioate	70.89	1.85058
53A	DTiP	2	Glutarate	DTiPGlutarate	79.79	1.90195
54A	DTiP	2	Methyl adipate	DTiPMethyl adipate	85.01	1.92947
55A	DTiP	2	Sebacate	DTiPSebacate	78.3	1.89376
56A	DTiP	2	Suberate	DTiP Suberate	70.44	1.84782
57A	DTiP	2	Succinate	DTiPSuccinate	77.07	1.88689
58A	DTB	2	Methyl adipate	DTBMethyl adipate	35.12	1.54555
59A	DTD	2	Methyl adipate	DTDMethyl adipate	20.83	1.31869
60A	DTE	2	Methyl adipate	DTEMethyl adipate	38.55	1.58602
61A	DTH	2	Methyl adipate	DTHMethyl adipate	25.48	1.4062
62A	DTM	2	Methyl adipate	DTMMethyl adipate	78	1.89209
63A	DTO	2	Methyl adipate	DTOMethyl adipate	40.88	1.61151
64A	HTH	2	Methyl adipate	HTHMethyl adipate	63.7	1.80414
65A	DTiB	2	Adipate	DTiBAdipate	41.4	1.617
66A	DTiB	2	diglycolate	DTiBdiglycolate	62.6	1.79657
67A	HTH	1	glutarate	HTHglutarate	53.2	1.72591
68A	THE	1	Adipate	THEAdipate	67.1	1.82672
69A	THE	1	diglycolate	THEdiglycolate	101.5	2.00647

## Sheet: M1
			Training set
NAME	X5A	C-005	CATS2D_09_DL	F06[C-N]	CATS2D_09_NL	MLOGP2	Log_FRLF	Predicted_FRFL
1	0.0895901	1	2	3	1	5.00755	2.05918	1.94655
2	0.0878716	1	3	3	1	5.99707	1.97589	1.97238
3	0.0878716	1	3	3	1	2.27084	1.94596	2.01374
4	0.0892288	1	3	3	2	7.05719	1.935	1.8056
5	0.0901772	1	1	3	0	7.45326	1.96332	2.02415
6	0.0901772	1	1	3	0	1.44522	1.92737	2.09084
7	0.0911312	1	2	3	0	11.9428	1.95134	1.85201
9	0.0879229	0	3	3	1	7.05719	1.89432	1.86586
11	0.0892412	0	3	3	2	8.18466	1.87795	1.70065
12	0.0901632	0	1	3	0	10.6301	1.84198	1.89801
13	0.0901632	0	1	3	0	1.9783	1.88986	1.99405
14	0.0910922	0	2	3	0	13.3124	1.83251	1.74743
15	0.0900607	0	2	4	1	8.18466	1.87967	1.79906
16	0.0884599	0	3	4	1	9.37654	1.8657	1.81564
17	0.0884599	0	3	4	1	4.53716	1.89321	1.86935
18	0.0897175	0	3	4	2	10.6301	1.50786	1.65265
19	0.0905906	0	1	4	0	13.3124	1.88252	1.85029
21	0.0914729	0	2	4	0	16.2137	1.76343	1.70006
22	0.0911191	0	3	4	1	10.6301	1.48001	1.6434
23	0.089561	0	4	4	1	11.9428	1.72263	1.6561
24	0.089561	0	4	4	1	6.39865	1.84448	1.71764
25	0.090771	0	4	4	2	13.3124	1.21484	1.49465
26	0.0915947	0	2	4	0	16.2137	1.80346	1.69281
27	0.0915947	0	2	4	0	4.81472	1.77085	1.81934
28	0.0924298	0	3	4	0	19.3185	1.70757	1.54312
29	0.0919991	0	3	4	1	20.7992	1.40654	1.47813
32	0.0916487	0	4	4	2	24.39	0.672098	1.31944
33	0.0924298	0	2	4	0	28.1673	1.67486	1.5104
34	0.0924298	0	2	4	0	12.14	1.85491	1.6883
35	0.0932242	0	3	4	0	32.1191	1.26482	1.35374
36	0.0921861	0	4	4	1	30.1221	1.27416	1.29801
39	0.0939808	0	2	4	0	36.2349	1.49693	1.32851
41	0.0947022	0	3	4	0	40.5052	0.934498	1.17266
42	0.0896043	0	3	5	2	13.1418	1.71999	1.63901
43	0.0885355	0	3	5	1	6.30685	1.86788	1.85271
44	0.0903524	0	1	5	0	4.71239	1.84466	1.96743
46	0.0893407	0	3	5	2	14.5386	1.50529	1.6392
47	0.0911139	0	2	5	0	19.0331	1.82302	1.69764
48	0.0903524	0	1	5	0	15.9872	1.82763	1.84228
49	0.0898943	0	2	5	1	10.5117	1.89081	1.79064
50	0.0884979	0	3	3	2	9.37654	1.79491	1.73167
51	0.0872059	0	3	3	1	3.70837	1.91084	1.94571
52	0.0894152	0	1	3	0	2.58485	1.85058	2.03185
56	0.0894152	0	1	3	0	11.9428	1.84782	1.92798
59	0.0929088	0	4	4	2	34.1571	1.31869	1.136
60	0.0889297	0	3	3	2	9.37654	1.58602	1.70597
62	0.0889089	1	3	3	2	8.18466	1.89209	1.81214
63	0.0913043	0	4	4	2	26.2561	1.61151	1.31923
65	0.0901638	0	3	5	2	10.6301	1.617	1.63358
66	0.0889293	0	3	5	1	4.53716	1.79657	1.84891
67	0.0886498	0	5	3	1	10.6301	1.72591	1.65192
69	0.0869219	0	3	2	1	2.27084	2.00647	1.97108
			Test set
NAME	X5A	C-005	CATS2D_09_DL	F06[C-N]	CATS2D_09_NL	MLOGP2	Log_FRLF	Predicted_FRFL
10	0.0879229	0	3	3	1	2.95175	1.91381	1.91143
20	0.0905906	0	1	4	0	3.26169	1.91803	1.96186
30	0.0904815	0	4	4	1	22.5704	1.63448	1.48333
31	0.0904815	0	4	4	1	14.6673	1.82282	1.57105
38	0.0932756	0	4	4	2	32.1191	0.278754	1.13678
45	0.0885355	0	3	5	1	11.7988	1.85425	1.79175
53	0.0872059	0	3	3	1	8.18466	1.90195	1.89603
54	0.0882146	0	3	3	2	10.6301	1.92947	1.73463
55	0.0903395	0	2	3	0	14.7367	1.89376	1.77644
57	0.088829	0	2	3	1	7.05719	1.88689	1.87741
58	0.0894058	0	3	4	2	11.9428	1.54555	1.65664
61	0.0904403	0	4	4	2	14.7367	1.4062	1.49853
64	0.089576	0	3	3	0	14.1816	1.80414	1.76255
68	0.0869219	0	4	2	1	5.99707	1.82672	1.86422

## Sheet: M2
			Training set
NAME	X5A	C-005	CATS2D_06_AA	F06[C-N]	CATS2D_09_NL	MLOGP2	Log_FRLF	Predicted_FRFL
1	0.0895901	1	0	3	1	5.00755	2.05918	1.96874
2	0.0878716	1	4	3	1	5.99707	1.97589	1.98293
3	0.0878716	1	4	3	1	2.27084	1.94596	2.03137
4	0.0892288	1	0	3	2	7.05719	1.935	1.80479
5	0.0901772	1	0	3	0	7.45326	1.96332	2.05719
6	0.0901772	1	4	3	0	1.44522	1.92737	2.03249
7	0.0911312	1	0	3	0	11.9428	1.95134	1.92673
9	0.0879229	0	4	3	1	7.05719	1.89432	1.85557
11	0.0892412	0	0	3	2	8.18466	1.87795	1.6795
12	0.0901632	0	0	3	0	10.6301	1.84198	1.90724
13	0.0901632	0	4	3	0	1.9783	1.88986	1.91692
14	0.0910922	0	0	3	0	13.3124	1.83251	1.80218
15	0.0900607	0	0	4	1	8.18466	1.87967	1.79268
16	0.0884599	0	4	4	1	9.37654	1.8657	1.79534
17	0.0884599	0	4	4	1	4.53716	1.89321	1.85825
18	0.0897175	0	0	4	2	10.6301	1.50786	1.62222
19	0.0905906	0	0	4	0	13.3124	1.88252	1.85058
21	0.0914729	0	0	4	0	16.2137	1.76343	1.74619
22	0.0911191	0	0	4	1	10.6301	1.48001	1.68091
23	0.089561	0	4	4	1	11.9428	1.72263	1.67878
24	0.089561	0	4	4	1	6.39865	1.84448	1.75085
25	0.090771	0	0	4	2	13.3124	1.21484	1.50775
26	0.0915947	0	0	4	0	16.2137	1.80346	1.73699
27	0.0915947	0	4	4	0	4.81472	1.77085	1.78237
28	0.0924298	0	0	4	0	19.3185	1.70757	1.63352
29	0.0919991	0	0	4	1	20.7992	1.40654	1.48222
32	0.0916487	0	0	4	2	24.39	0.672098	1.29742
33	0.0924298	0	0	4	0	28.1673	1.67486	1.51849
34	0.0924298	0	4	4	0	12.14	1.85491	1.62404
35	0.0932242	0	0	4	0	32.1191	1.26482	1.40709
36	0.0921861	0	4	4	1	30.1221	1.27416	1.24409
39	0.0939808	0	0	4	0	36.2349	1.49693	1.29642
41	0.0947022	0	0	4	0	40.5052	0.934498	1.18639
42	0.0896043	0	0	5	2	13.1418	1.71999	1.60862
43	0.0885355	0	4	5	1	6.30685	1.86788	1.84003
44	0.0903524	0	4	5	0	4.71239	1.84466	1.88807
46	0.0893407	0	0	5	2	14.5386	1.50529	1.61038
47	0.0911139	0	0	5	0	19.0331	1.82302	1.74717
48	0.0903524	0	0	5	0	15.9872	1.82763	1.8443
49	0.0898943	0	0	5	1	10.5117	1.89081	1.7855
50	0.0884979	0	0	3	2	9.37654	1.79491	1.72017
51	0.0872059	0	4	3	1	3.70837	1.91084	1.95328
52	0.0894152	0	4	3	0	2.58485	1.85058	1.96555
56	0.0894152	0	0	3	0	11.9428	1.84782	1.9467
59	0.0929088	0	0	4	2	34.1571	1.31869	1.07523
60	0.0889297	0	0	3	2	9.37654	1.58602	1.68754
62	0.0889089	1	0	3	2	8.18466	1.89209	1.81431
63	0.0913043	0	0	4	2	26.2561	1.61151	1.29918
65	0.0901638	0	0	5	2	10.6301	1.617	1.599
66	0.0889293	0	4	5	1	4.53716	1.79657	1.83329
67	0.0886498	0	4	3	1	10.6301	1.72591	1.75419
69	0.0869219	0	4	2	1	2.27084	2.00647	1.98293
			Test set
NAME	X5A	C-005	CATS2D_06_AA	F06[C-N]	CATS2D_09_NL	MLOGP2	Log_FRLF	Predicted_FRFL
10	0.0879229	0	4	3	1	2.95175	1.91381	1.90894
20	0.0905906	0	4	4	0	3.26169	1.91803	1.87844
30	0.0904815	0	4	4	1	22.5704	1.63448	1.47107
31	0.0904815	0	4	4	1	14.6673	1.82282	1.57381
38	0.0932756	0	0	4	2	32.1191	0.278754	1.07401
45	0.0885355	0	4	5	1	11.7988	1.85425	1.76864
53	0.0872059	0	4	3	1	8.18466	1.90195	1.89509
54	0.0882146	0	0	3	2	10.6301	1.92947	1.72528
55	0.0903395	0	0	3	0	14.7367	1.89376	1.84054
57	0.088829	0	0	3	1	7.05719	1.88689	1.88991
58	0.0894058	0	0	4	2	11.9428	1.54555	1.62871
61	0.0904403	0	0	4	2	14.7367	1.4062	1.51422
64	0.089576	0	0	3	0	14.1816	1.80414	1.90544
68	0.0869219	0	4	2	1	5.99707	1.82672	1.93449

## Sheet: M3
			Training set
NAME	X5A	C-005	CATS2D_09_DL	F10[C-O]	CATS2D_09_NL	MLOGP2	Log_FRLF	Predicted_FRFL
1	0.0895901	1	2	8	1	5.00755	2.05918	2.0249
2	0.0878716	1	3	8	1	5.99707	1.97589	2.01427
3	0.0878716	1	3	9	1	2.27084	1.94596	2.00816
4	0.0892288	1	3	10	2	7.05719	1.935	1.81724
5	0.0901772	1	1	8	0	7.45326	1.96332	2.10672
6	0.0901772	1	1	10	0	1.44522	1.92737	2.08179
7	0.0911312	1	2	10	0	11.9428	1.95134	1.88706
9	0.0879229	0	3	9	1	7.05719	1.89432	1.87512
11	0.0892412	0	3	11	2	8.18466	1.87795	1.67895
12	0.0901632	0	1	9	0	10.6301	1.84198	1.95139
13	0.0901632	0	1	11	0	1.9783	1.88986	1.94972
14	0.0910922	0	2	11	0	13.3124	1.83251	1.74857
15	0.0900607	0	2	9	1	8.18466	1.87967	1.85136
16	0.0884599	0	3	9	1	9.37654	1.8657	1.83452
17	0.0884599	0	3	10	1	4.53716	1.89321	1.83821
18	0.0897175	0	3	11	2	10.6301	1.50786	1.63953
19	0.0905906	0	1	9	0	13.3124	1.88252	1.91172
21	0.0914729	0	2	11	0	16.2137	1.76343	1.70873
22	0.0911191	0	3	10	1	10.6301	1.48001	1.68466
23	0.089561	0	4	10	1	11.9428	1.72263	1.66516
24	0.089561	0	4	11	1	6.39865	1.84448	1.67505
25	0.090771	0	4	12	2	13.3124	1.21484	1.47094
26	0.0915947	0	2	10	0	16.2137	1.80346	1.74305
27	0.0915947	0	2	12	0	4.81472	1.77085	1.76557
28	0.0924298	0	3	12	0	19.3185	1.70757	1.54005
29	0.0919991	0	3	11	1	20.7992	1.40654	1.5232
32	0.0916487	0	4	13	2	24.39	0.672098	1.30158
33	0.0924298	0	2	11	0	28.1673	1.67486	1.56758
34	0.0924298	0	2	13	0	12.14	1.85491	1.63082
35	0.0932242	0	3	13	0	32.1191	1.26482	1.35865
36	0.0921861	0	4	12	1	30.1221	1.27416	1.32874
39	0.0939808	0	2	12	0	36.2349	1.49693	1.3994
41	0.0947022	0	3	14	0	40.5052	0.934498	1.19041
42	0.0896043	0	3	12	2	13.1418	1.71999	1.58278
43	0.0885355	0	3	11	1	6.30685	1.86788	1.7809
44	0.0903524	0	1	12	0	4.71239	1.84466	1.87965
46	0.0893407	0	3	12	2	14.5386	1.50529	1.5804
47	0.0911139	0	2	12	0	19.0331	1.82302	1.65851
48	0.0903524	0	1	10	0	15.9872	1.82763	1.85823
49	0.0898943	0	2	10	1	10.5117	1.89081	1.79823
50	0.0884979	0	3	12	2	9.37654	1.79491	1.6575
51	0.0872059	0	3	11	1	3.70837	1.91084	1.85373
52	0.0894152	0	1	12	0	2.58485	1.85058	1.93359
56	0.0894152	0	1	10	0	11.9428	1.84782	1.92904
59	0.0929088	0	4	14	2	34.1571	1.31869	1.12937
60	0.0889297	0	3	11	2	9.37654	1.58602	1.68017
62	0.0889089	1	3	10	2	8.18466	1.89209	1.81934
63	0.0913043	0	4	13	2	26.2561	1.61151	1.2981
65	0.0901638	0	3	11	2	10.6301	1.617	1.62276
66	0.0889293	0	3	10	1	4.53716	1.79657	1.82057
67	0.0886498	0	5	8	1	10.6301	1.72591	1.72226
69	0.0869219	0	3	6	1	2.27084	2.00647	2.07155
			Test set
NAME	X5A	C-005	CATS2D_09_DL	F10[C-O]	CATS2D_09_NL	MLOGP2	Log_FRLF	Predicted_FRFL
10	0.0879229	0	3	10	1	2.95175	1.91381	1.87234
20	0.0905906	0	1	11	0	3.26169	1.91803	1.92237
30	0.0904815	0	4	11	1	22.5704	1.63448	1.49815
31	0.0904815	0	4	12	1	14.6673	1.82282	1.5288
38	0.0932756	0	4	14	2	32.1191	0.278754	1.13352
45	0.0885355	0	3	10	1	11.7988	1.85425	1.77147
53	0.0872059	0	3	10	1	8.18466	1.90195	1.85324
54	0.0882146	0	3	12	2	10.6301	1.92947	1.65711
55	0.0903395	0	2	12	0	14.7367	1.89376	1.72542
57	0.088829	0	2	10	1	7.05719	1.88689	1.86867
58	0.0894058	0	3	11	2	11.9428	1.54555	1.6397
61	0.0904403	0	4	12	2	14.7367	1.4062	1.47083
64	0.089576	0	3	8	0	14.1816	1.80414	1.8481
68	0.0869219	0	4	7	1	5.99707	1.82672	1.93336

## Sheet: M4
			Training set
NAME	X5A	C-005	CATS2D_09_DL	DLS_02	CATS2D_09_NL	MLOGP2	Log_FRLF	Predicted_FRFL
1	0.0895901	1	2	0.666667	1	5.00755	2.05918	2.1189
2	0.0878716	1	3	0.5	1	5.99707	1.97589	1.94031
3	0.0878716	1	3	0.5	1	2.27084	1.94596	1.96825
4	0.0892288	1	3	0.5	2	7.05719	1.935	1.81958
5	0.0901772	1	1	0.5	0	7.45326	1.96332	2.02796
6	0.0901772	1	1	0.5	0	1.44522	1.92737	2.07302
7	0.0911312	1	2	0.5	0	11.9428	1.95134	1.89842
9	0.0879229	0	3	0.5	1	7.05719	1.89432	1.82726
11	0.0892412	0	3	0.5	2	8.18466	1.87795	1.70747
12	0.0901632	0	1	0.5	0	10.6301	1.84198	1.90145
13	0.0901632	0	1	0.5	0	1.9783	1.88986	1.96633
14	0.0910922	0	2	0.5	0	13.3124	1.83251	1.78639
15	0.0900607	0	2	0.5	1	8.18466	1.87967	1.80038
16	0.0884599	0	3	0.5	1	9.37654	1.8657	1.79001
17	0.0884599	0	3	0.5	1	4.53716	1.89321	1.82631
18	0.0897175	0	3	0.5	2	10.6301	1.50786	1.67152
19	0.0905906	0	1	0.5	0	13.3124	1.88252	1.86553
21	0.0914729	0	2	0.5	0	16.2137	1.76343	1.75056
22	0.0911191	0	3	0.5	1	10.6301	1.48001	1.68231
23	0.089561	0	4	0.5	1	11.9428	1.72263	1.66946
24	0.089561	0	4	0.5	1	6.39865	1.84448	1.71104
25	0.090771	0	4	0.5	2	13.3124	1.21484	1.55186
26	0.0915947	0	2	0.5	0	16.2137	1.80346	1.74605
27	0.0915947	0	2	0.5	0	4.81472	1.77085	1.83155
28	0.0924298	0	3	0.5	0	19.3185	1.70757	1.6313
29	0.0919991	0	3	0.333333	1	20.7992	1.40654	1.39941
32	0.0916487	0	4	0.333333	2	24.39	0.672098	1.26224
33	0.0924298	0	2	0.333333	0	28.1673	1.67486	1.45143
34	0.0924298	0	2	0.5	0	12.14	1.85491	1.74573
35	0.0932242	0	3	0.333333	0	32.1191	1.26482	1.33183
36	0.0921861	0	4	0.333333	1	30.1221	1.27416	1.26198
39	0.0939808	0	2	0.333333	0	36.2349	1.49693	1.33359
41	0.0947022	0	3	0.333333	0	40.5052	0.934498	1.2143
42	0.0896043	0	3	0.5	2	13.1418	1.71999	1.65687
43	0.0885355	0	3	0.5	1	6.30685	1.86788	1.81024
44	0.0903524	0	1	0.5	0	4.71239	1.84466	1.93883
46	0.0893407	0	3	0.5	2	14.5386	1.50529	1.65614
47	0.0911139	0	2	0.5	0	19.0331	1.82302	1.74268
48	0.0903524	0	1	0.5	0	15.9872	1.82763	1.85427
49	0.0898943	0	2	0.5	1	10.5117	1.89081	1.78907
50	0.0884979	0	3	0.5	2	9.37654	1.79491	1.72601
51	0.0872059	0	3	0.5	1	3.70837	1.91084	1.87888
52	0.0894152	0	1	0.5	0	2.58485	1.85058	1.98944
56	0.0894152	0	1	0.5	0	11.9428	1.84782	1.91925
59	0.0929088	0	4	0.333333	2	34.1571	1.31869	1.1424
60	0.0889297	0	3	0.5	2	9.37654	1.58602	1.71004
62	0.0889089	1	3	0.5	2	8.18466	1.89209	1.82295
63	0.0913043	0	4	0.333333	2	26.2561	1.61151	1.26097
65	0.0901638	0	3	0.5	2	10.6301	1.617	1.65502
66	0.0889293	0	3	0.5	1	4.53716	1.79657	1.80896
67	0.0886498	0	5	0.5	1	10.6301	1.72591	1.65239
69	0.0869219	0	3	0.5	1	2.27084	2.00647	1.90016
			Test set
NAME	X5A	C-005	CATS2D_09_DL	DLS_02	CATS2D_09_NL	MLOGP2	Log_FRLF	Predicted_FRFL
10	0.0879229	0	3	0.5	1	2.95175	1.91381	1.85805
20	0.0905906	0	1	0.5	0	3.26169	1.91803	1.94091
30	0.0904815	0	4	0.333333	1	22.5704	1.63448	1.38163
31	0.0904815	0	4	0.5	1	14.6673	1.82282	1.615
38	0.0932756	0	4	0.333333	2	32.1191	0.278754	1.14413
45	0.0885355	0	3	0.5	1	11.7988	1.85425	1.76905
53	0.0872059	0	3	0.5	1	8.18466	1.90195	1.8453
54	0.0882146	0	3	0.5	2	10.6301	1.92947	1.72708
55	0.0903395	0	2	0.5	0	14.7367	1.89376	1.80353
57	0.088829	0	2	0.5	1	7.05719	1.88689	1.85436
58	0.0894058	0	3	0.5	2	11.9428	1.54555	1.6732
61	0.0904403	0	4	0.5	2	14.7367	1.4062	1.5534
64	0.089576	0	3	0.666667	0	14.1816	1.80414	1.94941
68	0.0869219	0	4	0.5	1	5.99707	1.82672	1.81161

## Sheet: Dataset for protein adsorption
												1B
	Dataset for protein adsorption											2B
												3B
												4B
Compound No.	Polymers	Q	n	A	FA(%)	log_FA						5B
1B	DTMSuberate	DTM	2	SUBERATE	139.09	2.1433						6B
2B	DTOSebacate	DTO	2	SEBACATE	66	1.81954						7B
3B	DTOGlutarate	DTO	2	GLUTARATE	64.8	1.81158						8B
4B	DTOAdipate	DTO	2	ADIPATE	78.3	1.89376						9B
5B	DTOSuberate	DTO	2	SUBERATE	82.19	1.91482						10B
6B	DTOSuccinate	DTO	2	SUCCINATE	121.97	2.08625						11B
7B	HTHAdipate	HTH	2	ADIPATE	76.2	1.88195						12B
8B	DTODiglycolate	DTO	2	DIGLYCOLATE	142.69	2.15439						13B
9B	HTHSuberate	HTH	2	SUBERATE	77.16	1.88739						14B
10B	DTBnSebacate	DTBn	2	SEBACATE	80.3	1.90472						15B
11B	DTBnSuberate	DTBn	2	SUBERATE	92.1	1.96426						16B
12B	DTBnAdipate	DTBn	2	ADIPATE	142.16	2.15278						17B
13B	DTBnMethyladipate	DTBn	2	METHYLADIPATE	138.92	2.14276						18B
14B	DTiBAdipate	DTiB	2	ADIPATE	88	1.94448						19B
15B	DTHSuberate	DTH	2	SUBERATE	91.68	1.96227						20B
16B	DTHGlutarate	DTH	2	GLUTARATE	96.75	1.98565						21B
17B	DTHSuccinate	DTH	2	SUCCINATE	131.93	2.12034						22B
18B	DTHDiglycolate	DTH	2	DIGLYCOLATE	142.29	2.15317						23B
19B	DTMSebacate	DTM	2	SEBACATE	99.14	1.99625						24B
20B	DTMMethyladipate	DTM	2	METHYLADIPATE	125.7	2.09934						25B
21B	DTMAdipate	DTM	2	ADIPATE	142.69	2.15439						26B
22B	DTBSuberate	DTB	2	SUBERATE	105.06	2.02144						27B
23B	DTBMethyladipate	DTB	2	METHYLADIPATE	122.06	2.08657						28B
24B	DTBGlutarate	DTB	2	GLUTARATE	123.38	2.09124						29B
25B	DTBAdipate	DTB	2	ADIPATE	127.12	2.10421						30B
26B	DTBSuccinate	DTB	2	SUCCINATE	129.36	2.1118						31B
27B	HTESuberate	THE	1	SUBERATE	107.69	2.03218						32B
28B	HTEAdipate	THE	1	ADIPATE	125.19	2.09757						33B
29B	HTEMethyladipate	THE	1	METHYLADIPATE	146.01	2.16438						34B
30B	HTESuccinate	THE	1	SUCCINATE	182.15	2.26043						35B
31B	DTsBSuberate	DTsB	2	SUBERATE	108.71	2.03627						36B
32B	DTsBAdipate	DTsB	2	ADIPATE	125.35	2.09812						37B
33B	DTsBGlutarate	DTsB	2	GLUTARATE	132.32	2.12163						38B
34B	DTsBMethyladipate	DTsB	2	METHYLADIPATE	153.27	2.18546						39B
35B	DTiPMethyladipate	DTiP	2	METHYLADIPATE	142.85	2.15488						40B
36B	DTiPAdipate	DTiP	2	ADIPATE	121.76	2.0855
37B	DTEAdipate	DTE	2	ADIPATE	131.21	2.11797
38B	DTEGlutarate	DTE	2	GLUTARATE	151.44	2.18024
39B	DTEMethylAdipate	DTE	2	METHYLADIPATE	156.74	2.19518
40B	DTiBsebacate	DTiB	2	SEBACATE	56.6	1.75282

## Sheet: M1_FA
			Training set
NAME	Me	PW4	SsssCH	F10[O-O]	log_FA	Predicted_FA
30	1.02322	0.151713	-0.887541	2	2.26043	2.24024
39	1.01243	0.151259	-0.962882	1	2.19518	2.1587
13	1.00976	0.151086	-1.03172	1	2.14276	2.12393
20	1.01476	0.148192	-0.967138	1	2.09934	2.18488
38	1.01731	0.147009	-0.847307	1	2.18024	2.20032
23	1.00833	0.146593	-0.961702	1	2.08657	2.06161
34	1.00833	0.146471	-1.25492	1	2.18546	2.11874
29	1.01476	0.146321	-1.39462	2	2.16438	2.16227
11	1.00791	0.146198	-0.898414	1	1.96426	2.03961
10	1.00461	0.145234	-0.894002	1	1.90472	1.97531
36	1.01243	0.14398	-1.18444	1	2.0855	2.16455
21	1.01731	0.143638	-0.847843	1	2.15439	2.18293
26	1.01476	0.14361	-0.850472	1	2.1118	2.1381
7	1.00833	0.14346	-0.875395	2	1.88195	1.93124
1	1.01243	0.142569	-0.841666	1	2.1433	2.08969
9	1.00484	0.142506	-0.867987	2	1.88739	1.86296
25	1.0103	0.142365	-0.841494	1	2.10421	2.05078
24	1.01243	0.14232	-0.845542	1	2.09124	2.08916
32	1.0103	0.14224	-1.13203	1	2.09812	2.10736
33	1.01243	0.142191	-1.13846	1	2.12163	2.1462
17	1.0103	0.14207	-0.851103	1	2.12034	2.05114
22	1.00652	0.141444	-0.835318	1	2.02144	1.97785
6	1.00652	0.141195	-0.852106	1	2.08625	1.97986
4	1.00328	0.14019	-0.843128	1	1.89376	1.91551
15	1.00328	0.14016	-0.835948	1	1.96227	1.91394
8	1.01058	0.140094	-0.859011	1	2.15439	2.04746
3	1.00484	0.140094	-0.847176	1	1.81158	1.94343
5	1.00048	0.139455	-0.836952	1	1.91482	1.86076
2	0.998023	0.138812	-0.83254	1	1.81954	1.81306
40	1.00328	0.137115	-0.677015	1	1.75282	1.86682
			Test set
NAME	Me	PW4	SsssCH	F10[O-O]	log_FA	Predicted_FA
12	1.01175	0.147288	-0.904591	1	2.15278	2.11452
14	1.0103	0.138458	-0.693303	1	1.94448	2.00129
16	1.00833	0.140888	-0.846173	1	1.98565	2.00923
18	1.01464	0.140888	-0.858007	1	2.15317	2.12331
19	1.00833	0.141644	-0.837254	1	1.99625	2.0114
27	1.01243	0.148466	-0.869122	2	2.03218	2.02862
28	1.01731	0.149883	-0.87653	2	2.09757	2.1239
31	1.00652	0.141325	-1.12208	1	2.03627	2.03373
35	1.01464	0.147554	-1.32935	2	2.15488	2.15368
37	1.01476	0.146923	-0.843259	1	2.11797	2.15388

## Sheet: M2_FA
			Training set
NAME	Me	F08[C-O]	SsssCH	F10[O-O]	log_FA	Predicted_FA
8	1.01058	15	-0.859011	1	2.15439	2.08755
9	1.00484	15	-0.867987	2	1.88739	1.87576
2	0.998023	14	-0.83254	1	1.81954	1.81117
3	1.00484	14	-0.847176	1	1.81158	1.95745
5	1.00048	14	-0.836952	1	1.91482	1.86361
6	1.00652	14	-0.852106	1	2.08625	1.9938
7	1.00833	13	-0.875395	2	1.88195	1.93644
10	1.00461	13	-0.894002	1	1.90472	1.95753
11	1.00791	13	-0.898414	1	1.96426	2.02759
15	1.00328	13	-0.835948	1	1.96227	1.91491
17	1.0103	13	-0.851103	1	2.12034	2.0654
30	1.02322	13	-0.887541	2	2.26043	2.25069
40	1.00328	13	-0.677015	1	1.75282	1.87438
4	1.00328	12	-0.843128	1	1.89376	1.90964
22	1.00652	12	-0.835318	1	2.02144	1.97532
24	1.01243	12	-0.845542	1	2.09124	2.10151
26	1.01476	12	-0.850472	1	2.1118	2.15145
33	1.01243	12	-1.13846	1	2.12163	2.1762
1	1.01243	11	-0.841666	1	2.1433	2.09342
13	1.00976	11	-1.03172	1	2.14276	2.08593
29	1.01476	11	-1.39462	2	2.16438	2.189
38	1.01731	11	-0.847307	1	2.18024	2.19686
23	1.00833	10	-0.961702	1	2.08657	2.03124
25	1.0103	10	-0.841494	1	2.10421	2.04165
32	1.0103	10	-1.13203	1	2.09812	2.11573
34	1.00833	10	-1.25492	1	2.18546	2.10602
20	1.01476	9	-0.967138	1	2.09934	2.1599
21	1.01731	9	-0.847843	1	2.15439	2.18279
36	1.01243	9	-1.18444	1	2.0855	2.16662
39	1.01243	9	-0.962882	1	2.19518	2.11013
			Test set
NAME	Me	F08[C-O]	SsssCH	F10[O-O]	log_FA	Predicted_FA
12	1.01175	11	-0.904591	1	2.15278	2.09522
14	1.0103	11	-0.693303	1	1.94448	2.01096
16	1.00833	13	-0.846173	1	1.98565	2.02308
18	1.01464	14	-0.858007	1	2.15317	2.16504
19	1.00833	11	-0.837254	1	1.99625	2.00661
27	1.01243	13	-0.869122	2	2.03218	2.02052
28	1.01731	11	-0.87653	2	2.09757	2.11021
31	1.00652	12	-1.12208	1	2.03627	2.04844
35	1.01464	8	-1.32935	2	2.15488	2.14853
37	1.01476	9	-0.843259	1	2.11797	2.12831

## Sheet: M3_FA
			Training set
NAME	Me	C-005	SsssCH	F10[O-O]	log_FA	Predicted_FA
2	0.998023	0	-0.83254	1	1.81954	1.81134
3	1.00484	0	-0.847176	1	1.81158	1.95134
4	1.00328	0	-0.843128	1	1.89376	1.91917
5	1.00048	0	-0.836952	1	1.91482	1.86153
6	1.00652	0	-0.852106	1	2.08625	1.98613
7	1.00833	0	-0.875395	2	1.88195	1.92691
8	1.01058	0	-0.859011	1	2.15439	2.06905
9	1.00484	0	-0.867987	2	1.88739	1.85525
10	1.00461	0	-0.894002	1	1.90472	1.95828
11	1.00791	0	-0.898414	1	1.96426	2.02532
13	1.00976	0	-1.03172	1	2.14276	2.09493
15	1.00328	0	-0.835948	1	1.96227	1.91741
17	1.0103	0	-0.851103	1	2.12034	2.06143
22	1.00652	0	-0.835318	1	2.02144	1.98201
23	1.00833	0	-0.961702	1	2.08657	2.0493
24	1.01243	0	-0.845542	1	2.09124	2.10277
25	1.0103	0	-0.841494	1	2.10421	2.05907
26	1.01476	0	-0.850472	1	2.1118	2.15056
29	1.01476	0	-1.39462	2	2.16438	2.18295
30	1.02322	0	-0.887541	2	2.26043	2.22763
32	1.0103	0	-1.13203	1	2.09812	2.1304
33	1.01243	0	-1.13846	1	2.12163	2.17468
34	1.00833	0	-1.25492	1	2.18546	2.12128
36	1.01243	0	-1.18444	1	2.0855	2.18597
38	1.01731	0	-0.847307	1	2.18024	2.20081
39	1.01243	0	-0.962882	1	2.19518	2.13157
40	1.00328	0	-0.677015	1	1.75282	1.87839
1	1.01243	1	-0.841666	1	2.1433	2.06922
20	1.01476	1	-0.967138	1	2.09934	2.1466
21	1.01731	1	-0.847843	1	2.15439	2.16834
			Test set
NAME	Me	C-005	SsssCH	F10[O-O]	log_FA	Predicted_FA
12	1.01175	0	-0.904591	1	2.15278	2.10364
14	1.0103	0	-0.693303	1	1.94448	2.02269
16	1.00833	0	-0.846173	1	1.98565	2.02094
18	1.01464	0	-0.858007	1	2.15317	2.14999
19	1.00833	1	-0.837254	1	1.99625	1.98615
27	1.01243	0	-0.869122	2	2.03218	2.00736
28	1.01731	0	-0.87653	2	2.09757	2.10678
31	1.00652	0	-1.12208	1	2.03627	2.05241
35	1.01464	0	-1.32935	2	2.15488	2.16451
37	1.01476	0	-0.843259	1	2.11797	2.14879

## Sheet: M4_FA
			Training set
NAME	Me	F07[C-O]	SsssCH	F10[O-O]	log_FA	Predicted_FA
30	1.02322	15	-0.887541	2	2.26043	2.25558
38	1.01731	13	-0.847307	1	2.18024	2.20031
21	1.01731	10	-0.847843	1	2.15439	2.17974
26	1.01476	15	-0.850472	1	2.1118	2.16101
29	1.01476	11	-1.39462	2	2.16438	2.1761
20	1.01476	10	-0.967138	1	2.09934	2.15568
1	1.01243	14	-0.841666	1	2.1433	2.1027
33	1.01243	14	-1.13846	1	2.12163	2.17692
24	1.01243	13	-0.845542	1	2.09124	2.09676
36	1.01243	12	-1.18444	1	2.0855	2.17462
39	1.01243	11	-0.962882	1	2.19518	2.11231
8	1.01058	16	-0.859011	1	2.15439	2.08172
17	1.0103	16	-0.851103	1	2.12034	2.07375
32	1.0103	12	-1.13203	1	2.09812	2.11641
25	1.0103	11	-0.841494	1	2.10421	2.03685
13	1.00976	12	-1.03172	1	2.14276	2.07987
7	1.00833	12	-0.875395	2	1.88195	1.91733
34	1.00833	12	-1.25492	1	2.18546	2.10564
23	1.00833	11	-0.961702	1	2.08657	2.02541
11	1.00791	16	-0.898414	1	1.96426	2.03517
6	1.00652	17	-0.852106	1	2.08625	2.00109
22	1.00652	15	-0.835318	1	2.02144	1.9831
9	1.00484	16	-0.867987	2	1.88739	1.8693
3	1.00484	15	-0.847176	1	1.81158	1.95059
10	1.00461	16	-0.894002	1	1.90472	1.96439
15	1.00328	16	-0.835948	1	1.96227	1.92175
40	1.00328	15	-0.677015	1	1.75282	1.8751
4	1.00328	13	-0.843128	1	1.89376	1.90285
5	1.00048	17	-0.836952	1	1.91482	1.86962
2	0.998023	17	-0.83254	1	1.81954	1.81664
			Test set
NAME	Me	F07[C-O]	SsssCH	F10[O-O]	log_FA	Predicted_FA
12	1.01175	12	-0.904591	1	2.15278	2.09024
14	1.0103	11	-0.693303	1	1.94448	1.99978
16	1.00833	14	-0.846173	1	1.98565	2.01722
18	1.01464	15	-0.858007	1	2.15317	2.16034
19	1.00833	14	-0.837254	1	1.99625	2.01499
27	1.01243	15	-0.869122	2	2.03218	2.02306
28	1.01731	11	-0.87653	2	2.09757	2.10042
31	1.00652	16	-1.12208	1	2.03627	2.06172
35	1.01464	17	-1.32935	2	2.15488	2.19862
37	1.01476	11	-0.843259	1	2.11797	2.1316
